## Dexamethasone affects cell growth/apoptosis/chemosensitivity of colon cancer via glucocorticoid receptor $\alpha$ /NF- $\kappa$ B

Jianming He<sup>1,2,\*</sup>, Jinming Zhou<sup>1,\*</sup>, Weiwen Yang<sup>1</sup>, Qi Zhou<sup>1</sup>, Xi Liang<sup>3</sup>, Xueli Pang<sup>1</sup>, Jianjun Li<sup>1</sup>, Feng Pan<sup>1</sup> and Houjie Liang<sup>1</sup>

<sup>1</sup>Department of Oncology and Southwest Cancer Center, Southwest Hospital, Third Military Medical University, Chongqing 400038, China

<sup>2</sup>Department of Radiotherapy, Hebei Provincial Hospital of Traditional Chinese Medicine, Hebei University of Chinese Medicine, Shijiazhuang 050011, China

<sup>3</sup>Department of Radiology, Hebei Provincial Hospital of Traditional Chinese Medicine, Hebei University of Chinese Medicine, Shijiazhuang 050011, China

\*These authors have contributed equally to this work

**Correspondence to:** Houjie Liang, **email:** lianghoujie@sina.com

**Keywords:** glucocorticoid, glucocorticoid receptor, NF- $\kappa$ B, colon cancer, lymphoma

**Received:** November 11, 2016

**Accepted:** June 02, 2017

**Published:** June 28, 2017

**Copyright:** He et al. This is an open-access article distributed under the terms of the Creative Commons Attribution License 3.0 (CC BY 3.0), which permits unrestricted use, distribution, and reproduction in any medium, provided the original author and source are credited.

### ABSTRACT

**Glucocorticoids are effective to treat lymphoma and leukemia. Their effect in colon cancer remains far from clear. Here, we found that glucocorticoid receptor (GR)  $\alpha$  protein level was dramatically lower in colon cancer than in lymphoma. Colon cell lines LoVo and HCT116 were GR $\alpha$ -rich and GR $\alpha$  was not detectable in HT29 or SW480. Dexamethasone significantly inhibited cell growth of GR $\alpha$ -rich cell lines and did not significantly affect GR $\alpha$ -negative cell lines. Dexamethasone induced apoptosis and increased chemosensitivity of GR $\alpha$ -rich cell lines. Knockdown of GR $\alpha$  significantly attenuated dexamethasone effects on cell growth, apoptosis and chemosensitivity. NF- $\kappa$ B p65 significantly correlated with GR $\alpha$  in colon cancer samples. Dexamethasone decreased NF- $\kappa$ B p65 activity. Knockdown of NF- $\kappa$ B p65 increased apoptosis. Our data demonstrate GR $\alpha$  protein level is dramatically lower in colon cancer than in lymphoma. Dexamethasone inhibits cell growth, induces apoptosis and enhances chemosensitivity in colon cancer, at least partly, via GR $\alpha$  and NF- $\kappa$ B.**

### INTRODUCTION

Glucocorticoids have unique property to cause massive cell death and cell cycle arrest in malignant cells from the lymphoid lineage [1–2]. But they are generally not as effective in the treatment of non-hematological cancers [2–4]. Even so, glucocorticoids are commonly used in non-hematological tumors to relieve symptoms of cancers and treatments [2–4]. The use of glucocorticoids was associated with an increased response rate and a trend toward increased survival of patients with liver metastases from colorectal cancer (CRC) [4]. The mechanism is far from clear [2–4].

The main function of glucocorticoids is binding to their intracellular receptor, the glucocorticoid receptor (GR) [2, 5–6]. GR mainly exerts genomic or nongenomic

effects in nucleus. It can also interact with cellular membranes or cytosolic targets to trigger certain signaling cascades [2, 5, 7–8]. The expression of GR, the functions of GR and glucocorticoids are virtually cell type-specific [2–3, 5–6, 9–10]. This study explored the effects and mechanism of dexamethasone (a type of glucocorticoids) in colon cancer and lymphoma.

### RESULTS

**Colon cancer expresses dramatic lower GR $\alpha$  than lymphoma and only partial colon cancer cells express detectable GR $\alpha$**

Immunohistochemical staining of GR $\alpha$  of archival surgical resection specimens from 10 patients with

lymphoma (5 male; 5 female) and from 61 patients with colon cancer was analyzed (Figure 1A). GR $\alpha$  protein level was dramatically lower in colon cancer than in lymphoma. Almost all lymphoma cells were strong positive. Most of colon cancer cells were negative, a small part was weak positive and none was strong positive (Figure 1A). GR $\alpha$  in human CRC cell lines was evaluated using immunohistochemistry, western blot and semi-quantitative reverse transcription polymerase chain reaction (RT-PCR), respectively (Figure 1B–1D). Immunohistochemistry showed that GR $\alpha$  was positive in LoVo and HCT116. GR $\alpha$  was not detectable in HT29 or SW480 (Figure 1B). Western blot and RT-PCR showed that GR $\alpha$  was expressed in both LoVo and HCT116 while it was not detectable in HT29 or SW480 (Figure 1C and 1D). Microarray analysis showed that GR $\alpha$  mRNA level was significantly lower in CRC and in CRC cell lines than in normal colon epithelium (Figure 1E). These prove that GR $\alpha$  protein level is low in CRC and only partial CRC cells express detectable GR $\alpha$ .

In some cell types, the dominant mechanism of GR silencing is through methylation [2]. HT29 or SW480 cells were treated with the demethylating agent, 5-Aza-2'-deoxycytidin (5-Aza) [11–12]. Result of RT-PCR showed that 5-Aza treatment did not significantly increased GR $\alpha$  mRNA (Figure 1F). The promoter methylation status of GR was analyzed by methylation-specific PCR (MSP-PCR), a method allowing for distinction between unmethylated and methylated alleles [11–12]. MSP-PCR analyses verified that HT29 or SW480 displayed an unmethylated allele and GR methylated allele was not detectable (Figure 1G). As mentioned above, GR $\alpha$  was not detectable in HT29 or SW480 (Figure 1B–1D). Taken together, these imply that low expression of GR $\alpha$  in colon cancer might not be due to methylation.

### GR $\alpha$ correlates with colon cancer differentiation

Archival surgical resection specimens from 61 patients with colon cancer with a mean age of 55 (range 21–84) years were analyzed. Of the 61 cancer samples, 28 were in the right colon and 33 were in the left. 12 were Dukes' stage A, 26 were stage B, 18 were stage C and 5 were stage D. 7 were well differentiated, 41 were moderately differentiated and 13 were poorly differentiated. All samples underwent routine immunohistochemical staining for GR $\alpha$  protein.

Clinical and pathological features of patients and their correlation with the presence of immunohistochemical staining of GR $\alpha$  are summarized in Table 1. Positive GR $\alpha$  expression was found in 35 of 61 (57%) cases of colon cancer examined, while it was negative in the remaining 26 (43%). Of the 35 GR $\alpha$  positive cases, 31 (88.6%) were well to moderate differentiated while 4 (11.4%) were poor differentiated. Of the 26 GR $\alpha$  negative cases, 17 (65.4%) were well to moderate differentiated while 4 (34.6%) were poor differentiated. The presence of positive immunohistochemical staining for GR $\alpha$  significantly

correlated with cancer differentiation ( $P=0.029$ ). No statistically significant difference in GR $\alpha$  expression was found concerning sex, age, Dukes' stage, or lymph node metastasis.

### GR $\alpha$ agonist, dexamethasone, inhibits cell growth, induces apoptosis and enhances chemosensitivity in colon cancer

The above data demonstrate that though GR $\alpha$  expression is low in colon cancer *in vivo* on the whole, there are still some colon cancer cells expressing detectable GR $\alpha$ . It was unclear whether glucocorticoids affected GR-rich CRC cells [4, 9]. Correlation between GR $\alpha$  and cell cycle genes/apoptosis genes in CRC was analyzed. The heatmap showed that GR $\alpha$  strongly correlated with some cell cycle genes/apoptosis genes (Supplementary Figure 1).

To evaluate effect of glucocorticoids-GR $\alpha$  on cell growth in colon cancer, GR $\alpha$ -rich CRC cell lines (LoVo and HCT116) and GR $\alpha$ -negative CRC cell lines (HT29 and SW480) were treated with gradient dexamethasone for 3 days. Cell growth was assayed using MTT. Dexamethasone significantly inhibited cell growth of GR $\alpha$ -rich cell lines (LoVo and HCT116) in a dose dependent manner while it did not significantly change cell growth of GR $\alpha$ -negative cell lines (HT29 or SW480) (Figure 2A). In LoVo, cell growth inhibition ratios of  $1 \times 10^{-4}$ ,  $2 \times 10^{-4}$  and  $3 \times 10^{-4}$  mol/L (M) dexamethasone were 40.2%, 46.9%, 52.6%, respectively. In HCT116, they were 41.8%, 49.3%, 58.8%, respectively.

Effect of dexamethasone on apoptosis was explored. First, LoVo nucleus was stained with Hoechst 33342 (Figure 2B). Living cells show dispersion, uniform fluorescence in nuclei [13]. Apoptotic cells show nuclear condensation or nuclear fragmentation with fluorescence in nucleus or cytoplasm [13]. Dexamethasone treatment increased apoptosis in LoVo (Figure 2B). Second, DNA fragmentation, a biochemical hallmark of apoptosis, of LoVo cells incubated with  $1 \times 10^{-4}$  M dexamethasone for 24, 48 or 72 hours were separated using 1.8% gel electrophoresis (Figure 2C). Results verified dexamethasone increased apoptotic DNA fragmentation. Last, apoptosis was measured using flow cytometry after FITC Annexin V/propidium iodide (PI) staining (Figure 2D). LoVo and HCT116 were incubated with or without  $1 \times 10^{-4}$  M dexamethasone for 72 hours. Apoptosis ratio of LoVo treated with dexamethasone was  $34.8 \pm 1.9\%$  and that of control was  $2.9 \pm 0.4\%$  ( $p < 0.01$ ). Apoptosis ratio of HCT116 treated with dexamethasone was  $33.6 \pm 1.4\%$  and that of control was  $6.4 \pm 1.3\%$  ( $p < 0.01$ ). Collectively, these demonstrate that GR $\alpha$  agonist, dexamethasone, induces apoptosis.

Cell growth and apoptosis play key roles in chemosensitivity [14–16]. So, MTT assay was applied to evaluate effect of dexamethasone on chemosensitivity (Figure 2E–2H). LoVo was treated with 5-Fluorouracil (5-Fu alone), oxaliplatin (L-OHP alone), 5-Fluorouracil

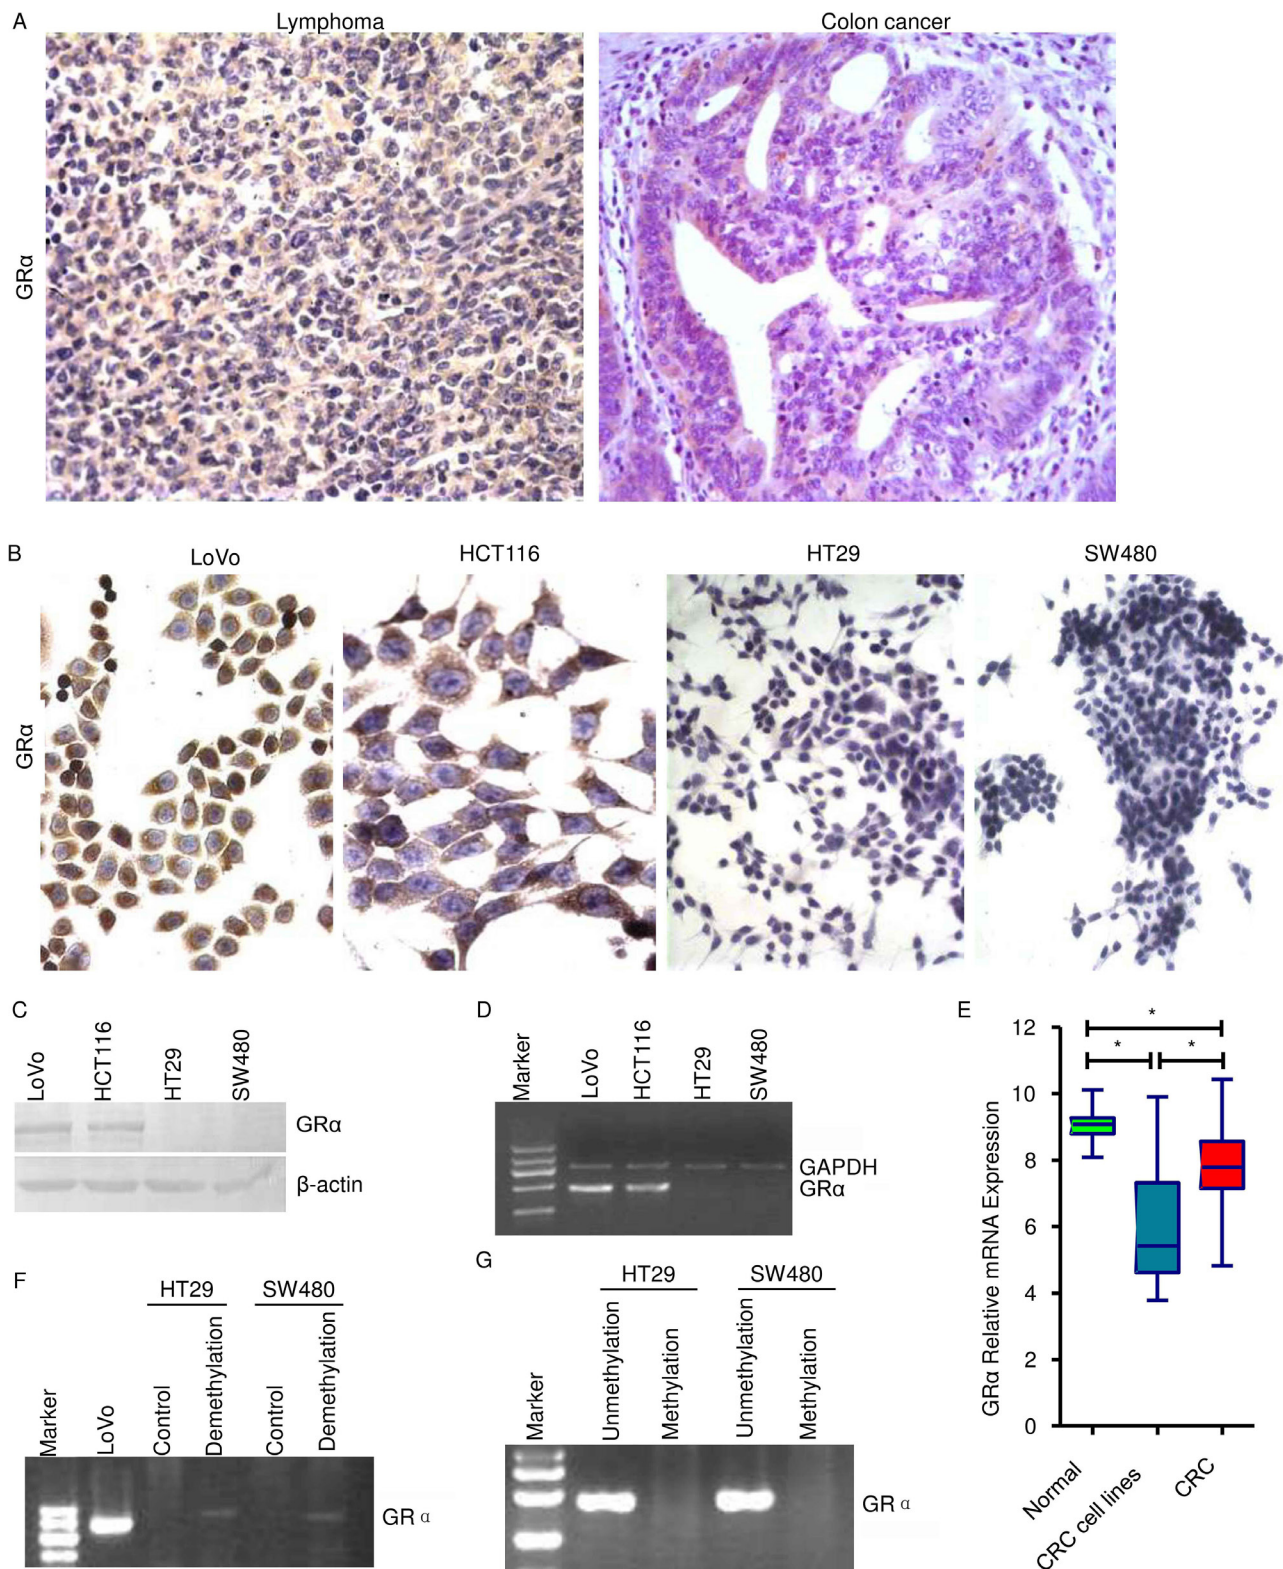

**Figure 1: Colon cancer expresses dramatic lower GRα than lymphoma.** (A) GRα immunohistochemistry of lymphoma and of colon cancer. (B) GRα immunohistochemistry of colon cancer cell lines. (C) Western blot. (D) RT-PCR. (E) Microarray analysis showed that GRα mRNA level was significantly lower in CRC and in CRC cell lines than in normal colon epithelium. The microarray datasets were obtained from the publicly available NCBI Gene Expression Omnibus databank. (F) Cells were treated with or without the demethylating agent 5-Aza and GRα mRNA was assayed using RT-PCR. (G) Representative MSP-PCR results. A visible PCR product in lanes unmethylation indicates the presence of unmethylated alleles whereas a PCR product in lanes methylation indicates the presence of methylated alleles.

**Table 1: Spearman's rank correlation coefficient analysis of the association between presence of immunohistochemical staining of GR $\alpha$  and NF- $\kappa$ B, and clinicopathological parameters in patients with colon cancer (n=61)**

| Parameter                    | GR $\alpha$ positive n(%) | GR $\alpha$ negative n(%) | P     |
|------------------------------|---------------------------|---------------------------|-------|
| Sex                          |                           |                           | 0.355 |
| Male, n=30                   | 19(63.3)                  | 11(37.7)                  |       |
| Female, n=31                 | 16(51.6)                  | 15(48.4)                  |       |
| Age, years                   |                           |                           | 0.973 |
| <60, n=28                    | 16(57.1)                  | 12(42.9)                  |       |
| $\geq$ 60, n=33              | 19(57.6)                  | 14(42.4)                  |       |
| Cancer differentiation grade |                           |                           | 0.029 |
| Well to Moderate, n=48       | 31(64.6)                  | 17(35.4)                  |       |
| Poor, n=13                   | 4(30.8)                   | 9(69.2)                   |       |
| Dukes' stage                 |                           |                           | 0.916 |
| A and B, n=38                | 22(57.9)                  | 16(42.1)                  |       |
| C and D, n=23                | 13(56.5)                  | 10(43.5)                  |       |
| Lymph node metastasis        |                           |                           | 0.241 |
| Positive, n=19               | 13(68.4)                  | 6(31.6)                   |       |
| Negative, n=42               | 22(52.4)                  | 20(47.6)                  |       |
| NF- $\kappa$ B               |                           |                           | 0.005 |
| Positive, n=40               | 28(70.0)                  | 12(30.0)                  |       |
| Negative, n=21               | 7(33.3)                   | 14(66.7)                  |       |

combined with  $1 \times 10^{-4}$  M dexamethasone (Dex+5-Fu), oxaliplatin combined with  $1 \times 10^{-4}$  M dexamethasone (Dex+L-OHP), 5-Fluorouracil following  $1 \times 10^{-4}$  M dexamethasone (Dex pre 5-Fu) 24 hours treatment, or oxaliplatin following  $1 \times 10^{-4}$  M dexamethasone 24 hours treatment (Dex pre L-OHP). Cells were incubated with anticancer drugs for 24 hours. Results showed that dexamethasone, regardless combined with or prior to anticancer drugs, significantly enhanced chemosensitivity (Figure 2E–2H). The half maximal inhibitory concentration (IC<sub>50</sub>) of 5-Fluorouracil were 72.2 $\pm$ 8.1 mg/L in 5-Fu alone, 18.6 $\pm$ 4.0 mg/L in Dex+5-Fu and 21.1 $\pm$ 4.1 in Dex pre 5-Fu (Figure 2F). IC<sub>50</sub> of oxaliplatin were 13.7 $\pm$ 1.3 mg/L in L-OHP alone, 4.8 $\pm$ 0.7 mg/L in Dex+L-OHP and 5.9 $\pm$ 0.6 mg/L in Dex pre L-OHP (Figure 2H).

### Dexamethasone functions, at least partly, through GR $\alpha$ in colon cancer

Immunohistochemistry showed that GR $\alpha$  resides predominantly in the cytoplasm of control LoVo cells (Figure 3A). GR $\alpha$  mainly traveled to the nucleus 6 hours after  $1 \times 10^{-4}$  M dexamethasone treatment (Figure

3A). RT-PCR and western blot showed that  $1 \times 10^{-4}$  M dexamethasone increased GR $\alpha$  mRNA and protein in a time dependent manner (Figure 3B and 3C).

To explore the role of GR $\alpha$  in dexamethasone functions in LoVo cells, GR $\alpha$  was knocked down by small hairpin RNA (shRNA). RT-PCR and western blot confirmed knockdown efficiency (Figure 3D and 3E). Cell growth inhibition was evaluated by MTT assay (Figure 3F). Dexamethasone significantly inhibited cell growth of LoVo control cells in a dose dependent manner (Figure 3F), similar as in LoVo parental cells (Figure 2A). Knockdown of GR $\alpha$  reduced the cell growth inhibition of dexamethasone. There was a significant difference between control cells and shGR $\alpha$  cells ( $p < 0.05$ ). These indicate that dexamethasone inhibits cell growth via GR $\alpha$ . LoVo control cells and shGR $\alpha$  cells were incubated with  $1 \times 10^{-4}$  M dexamethasone for 72 hours and apoptosis was measured using flow cytometry after FITC Annexin V/PI staining (Figure 3G) and using TUNEL (Figure 3H), respectively. Flow cytometry showed that apoptosis ratio was significantly lower in shGR $\alpha$  cells than in control cells ( $p < 0.01$ ) (Figure 3G). Result of TUNEL was consistency with Flow cytometry. Dexamethasone treatment induced less apoptosis in shGR $\alpha$  cells than in

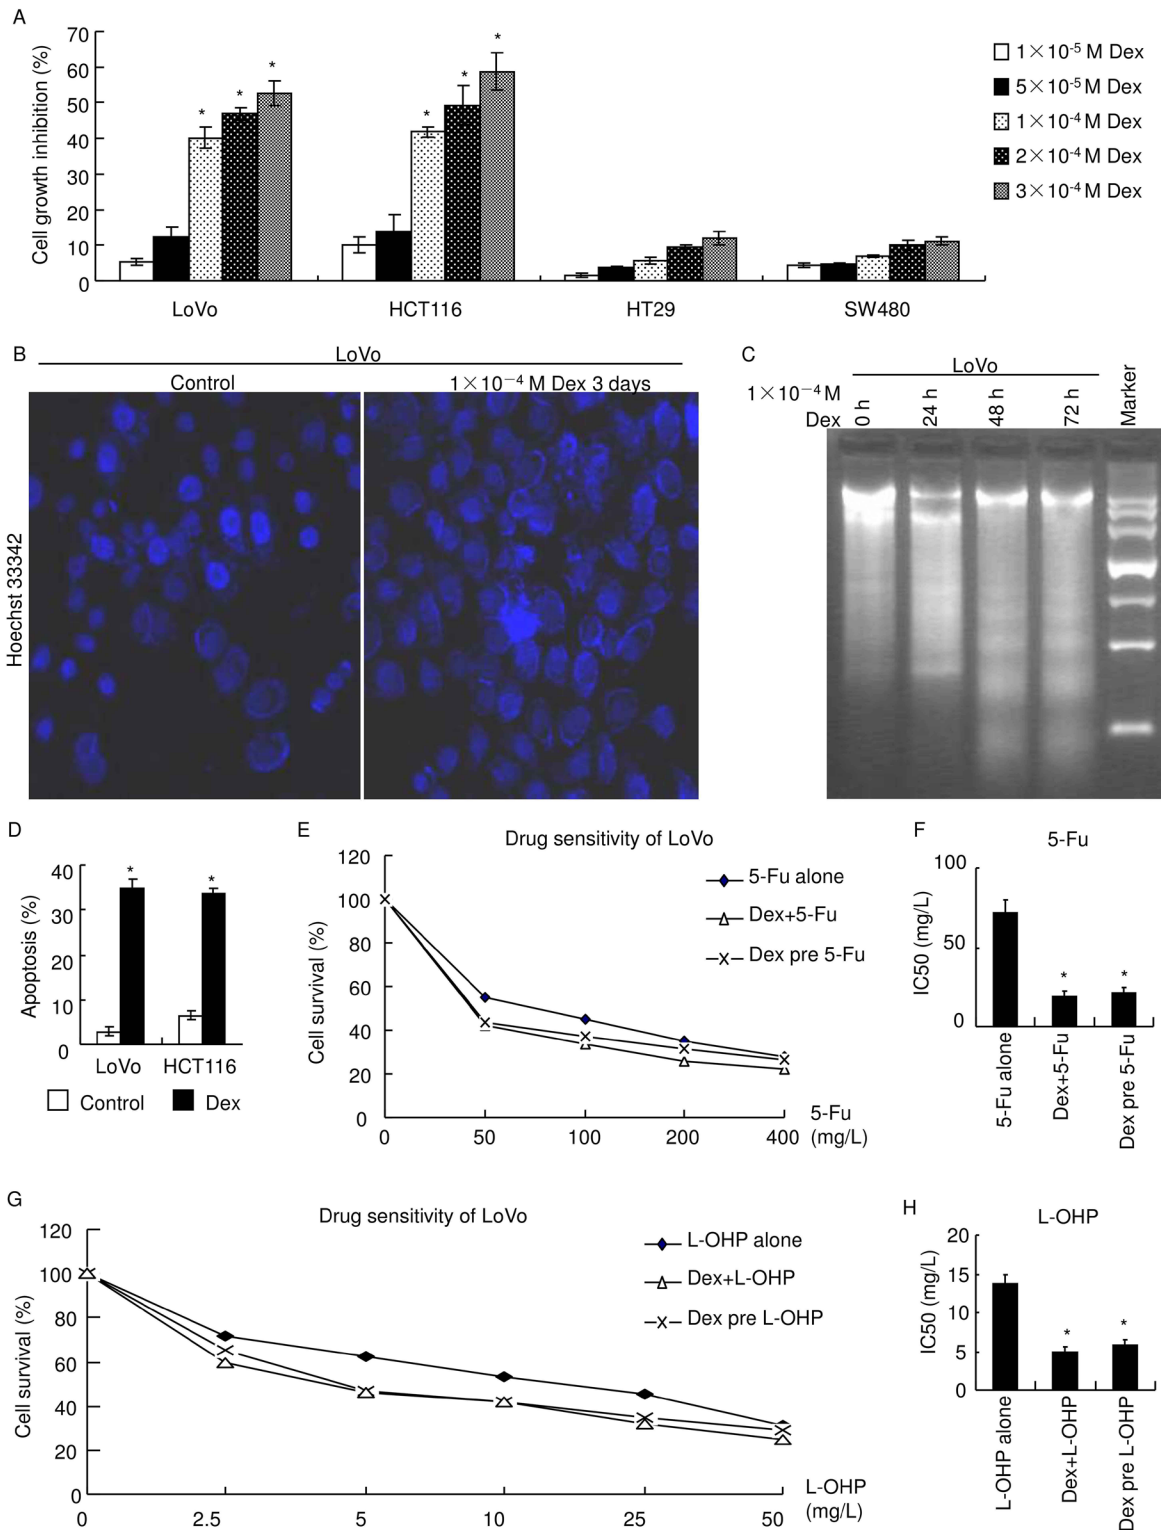

**Figure 2: GR $\alpha$  agonist, dexamethasone, inhibits cell growth, induces apoptosis and enhances chemosensitivity.** (A) Cells were treated with dexamethasone as indicated for 3 days. The absorbance was measured using MTT assay and normalized to their control cells (without dexamethasone), respectively. (\*: $p < 0.05$  vs  $1 \times 10^{-5}$  M) (B) Nucleus was stained with Hoechst 33342. Dexamethasone increased apoptosis. (C) DNA fragmentation. Dexamethasone increased apoptotic DNA fragmentation. (D) Cells were treated with  $1 \times 10^{-4}$  M dexamethasone for 72 hours and apoptosis was measured using flow cytometry after FITC Annexin V/PI staining. (\*: $p < 0.05$  vs control) (E, F) LoVo cells were treated with 5-Fluorouracil and cell survival was assayed using MTT. IC50 was calculated due to Fig. 2E. (\*: $p < 0.05$  vs 5-Fu alone) (G, H) LoVo cells were treated with oxaliplatin and cell survival was assayed using MTT. IC50 was calculated due to Fig. 2G. (\*: $p < 0.05$  vs L-OHP alone).

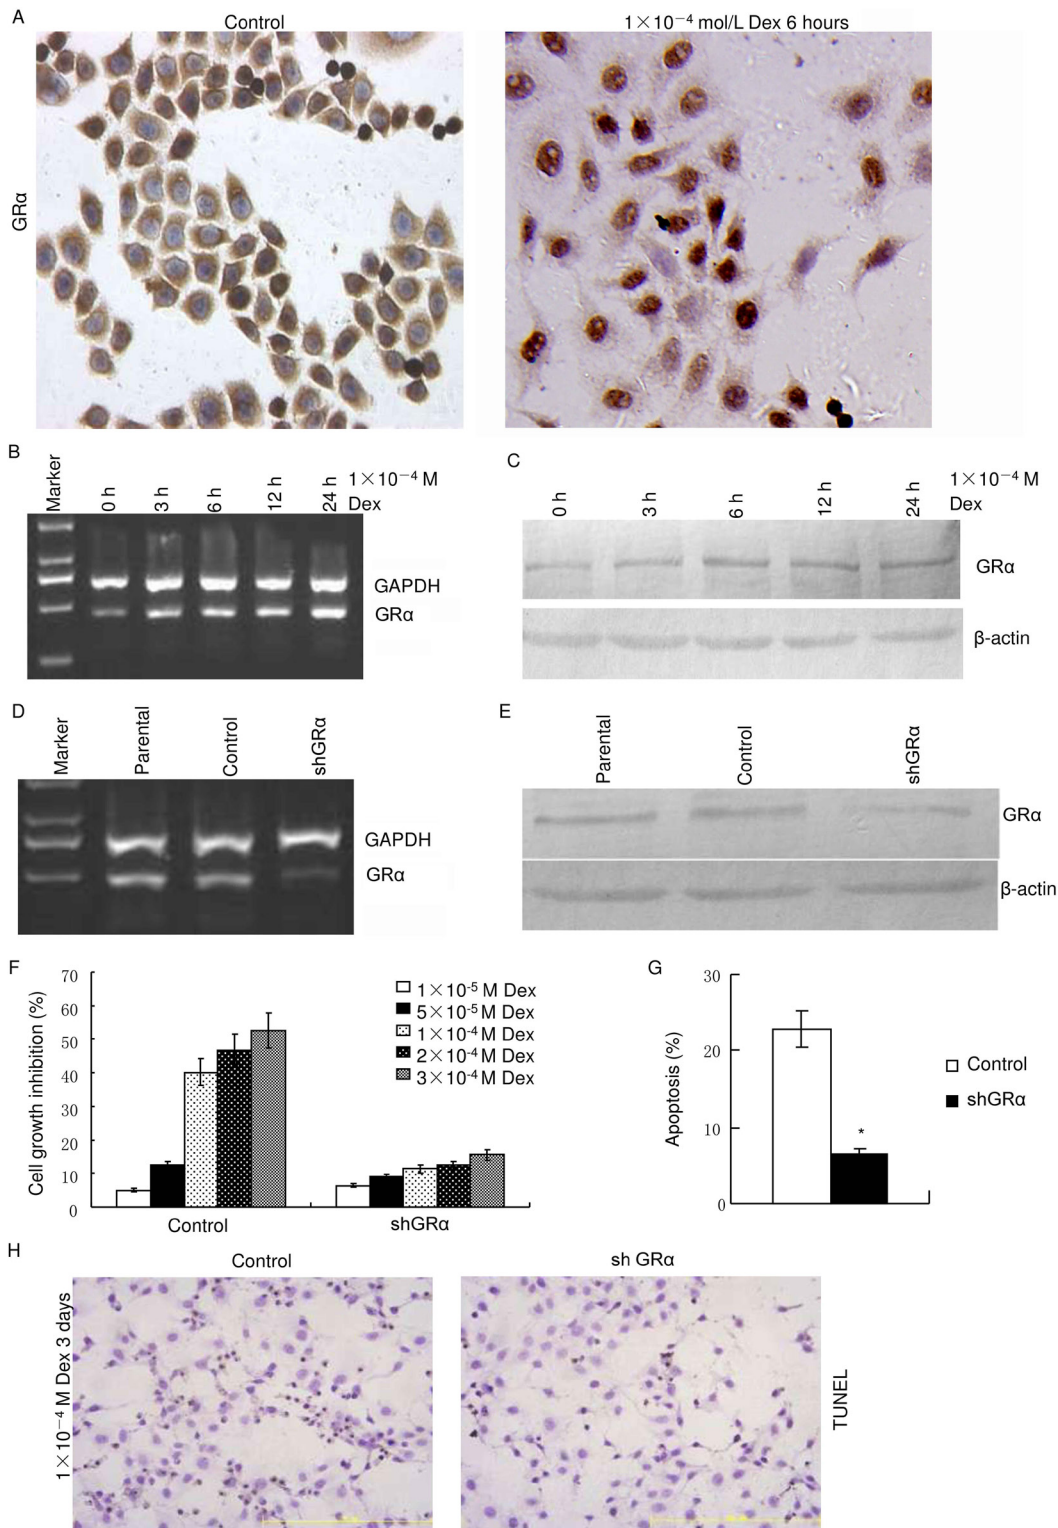

**Figure 3: GR agonist, dexamethasone, functions through GR $\alpha$  in LoVo.** (A) Cells were treated with dexamethasone as indicated and GR $\alpha$  was stained using immunohistochemistry. (B) Cells were treated with dexamethasone as indicated and GR $\alpha$  mRNA was evaluated using RT-PCR. (C) Cells were treated with dexamethasone as indicated and GR $\alpha$  protein was evaluated using western blot. (D) RT-PCR. GR $\alpha$  mRNA was knocked down using shRNA targeting GR $\alpha$  (shGR $\alpha$ ). (E) Western blot. GR $\alpha$  protein was decreased using shRNA. (F) Dexamethasone significantly inhibited cell growth of LoVo control cells and knockdown of GR $\alpha$  reduced the cell growth inhibition of dexamethasone. There was a significant difference between control group and shGR $\alpha$  group ( $p < 0.05$ ). (G) Cells were treated with  $1 \times 10^{-4}$  M dexamethasone for 72 hours and apoptosis was measured using flow cytometry after FITC Annexin V/PI staining. (\*: $p < 0.05$  vs control) (H) LoVo cells were treated with dexamethasone as indicated and apoptotic cells were stained using TUNEL.

control cells (Figure 3H). Taken together, these prove that dexamethasone inhibits cell growth and induces apoptosis, at least partly, through GR $\alpha$ .

### GR $\beta$ decreases apoptosis induced by dexamethasone in colon cancer

GR $\beta$  is an isoform of GR $\alpha$  and it has a shortened ligand-binding domain that cannot bind glucocorticoids [2, 6, 9]. When coexpressed with GR $\alpha$ , GR $\beta$  can function as a dominant negative splice variant of GR $\alpha$  [2, 6, 9]. Microarray analysis showed that GR $\beta$  protein level was significantly lower in CRC and in CRC cell lines than in normal colon epithelium (Figure 4A), similar as GR $\alpha$  (Figure 1E). RT-PCR showed that LoVo cells also expressed GR $\beta$  and  $1 \times 10^{-4}$  M dexamethasone increased GR $\beta$  mRNA level in a time dependent manner (Figure 4B). GR $\beta$  was knocked down by the small interfering RNA (siRNA) sequences (Figure 4C). Apoptosis was measured using flow cytometry after FITC Annexin V/PI staining (Figure 4D). LoVo control cells and siGR $\beta$  cells were incubated with  $1 \times 10^{-4}$  M dexamethasone for 72 hours. Knockdown of GR $\beta$  increased apoptosis induced by dexamethasone. Apoptosis ratio of siGR $\beta$  cells was  $45.4 \pm 4.3\%$  and that of control was  $33.8 \pm 1.5\%$  ( $p < 0.05$ ). These suggest that GR $\beta$  decreases apoptosis induced by dexamethasone.

### Dexamethasone suppresses NF- $\kappa$ B activity in colon cancer

NF- $\kappa$ B pathway was reported to play a key role of in apoptosis [2, 10, 17]. The heatmap showed that GR $\alpha$  strongly correlated with some apoptosis genes

(Supplementary Figure 1). Further microarray analysis showed that both GR $\alpha$  and GR $\beta$  strongly correlated with I $\kappa$ B $\alpha$ , an inhibitor of NF- $\kappa$ B [10, 17], in CRC patients (GSE39582) and CRC cell lines (Figure 5A–5D). Accordingly, the role of NF- $\kappa$ B in dexamethasone inducing apoptosis in LoVo was explored. The correlation of GR $\alpha$  and NF- $\kappa$ B in human colon cancer was explored. NF- $\kappa$ B p65 protein level in human colon carcinoma samples was evaluated using immunohistochemistry (Figure 5E). Clinical and pathological features of patients and their correlation with the presence of immunohistochemical staining of NF- $\kappa$ B are summarized in Table 1. NF- $\kappa$ B p65 significantly correlated with GR $\alpha$  ( $P = 0.005$ ).

RT-PCR and western blot showed that  $1 \times 10^{-4}$  M dexamethasone increased I $\kappa$ B $\alpha$  in a time dependent manner (Figure 5F and 5G). Electrophoretic mobility shift assay (EMSA) showed that  $1 \times 10^{-4}$  M dexamethasone decreased NF- $\kappa$ B activity in a time dependent manner (Figure 5H). NF- $\kappa$ B p65 was knocked down by retroviral mediated shRNA interference [14, 18] (Figure 5I). NF- $\kappa$ B p65 knockdown cells (shp65) and control cells were treated with 5 mg/L oxaliplatin for 24 hours. Western blot showed that p65 and p-p65 was decreased by retroviral delivery of shRNA. Knockdown of NF- $\kappa$ B p65 increased oxaliplatin induced cleaved caspase 3, an apoptotic marker [15–16] (Figure 5I). These indicate that dexamethasone suppresses NF- $\kappa$ B pathway.

### Dexamethasone increases GR and suppresses NF- $\kappa$ B activity in lymphoma

Glucocorticoids remain one of the most effective and most commonly used drugs to kill lymphoma cells.

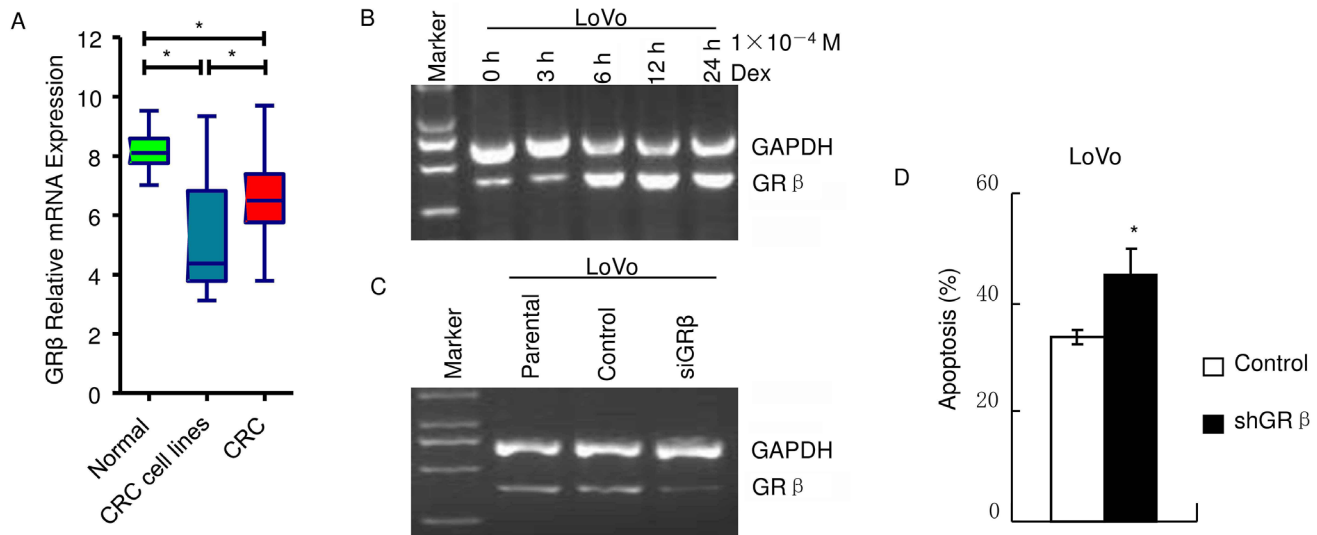

**Figure 4: GR $\beta$  decreases apoptosis induced by dexamethasone in LoVo.** (A) Microarray datasets showed CRC or CRC cell lines had a significant lower GR $\beta$  mRNA level than Normal samples. ( $*:p < 0.01$ ) (B and C) RT-PCR. (D) Cells were treated with  $1 \times 10^{-4}$  M dexamethasone for 72 hours and apoptosis was measured using flow cytometry after FITC Annexin V/PI staining. ( $*:p < 0.05$  vs control).

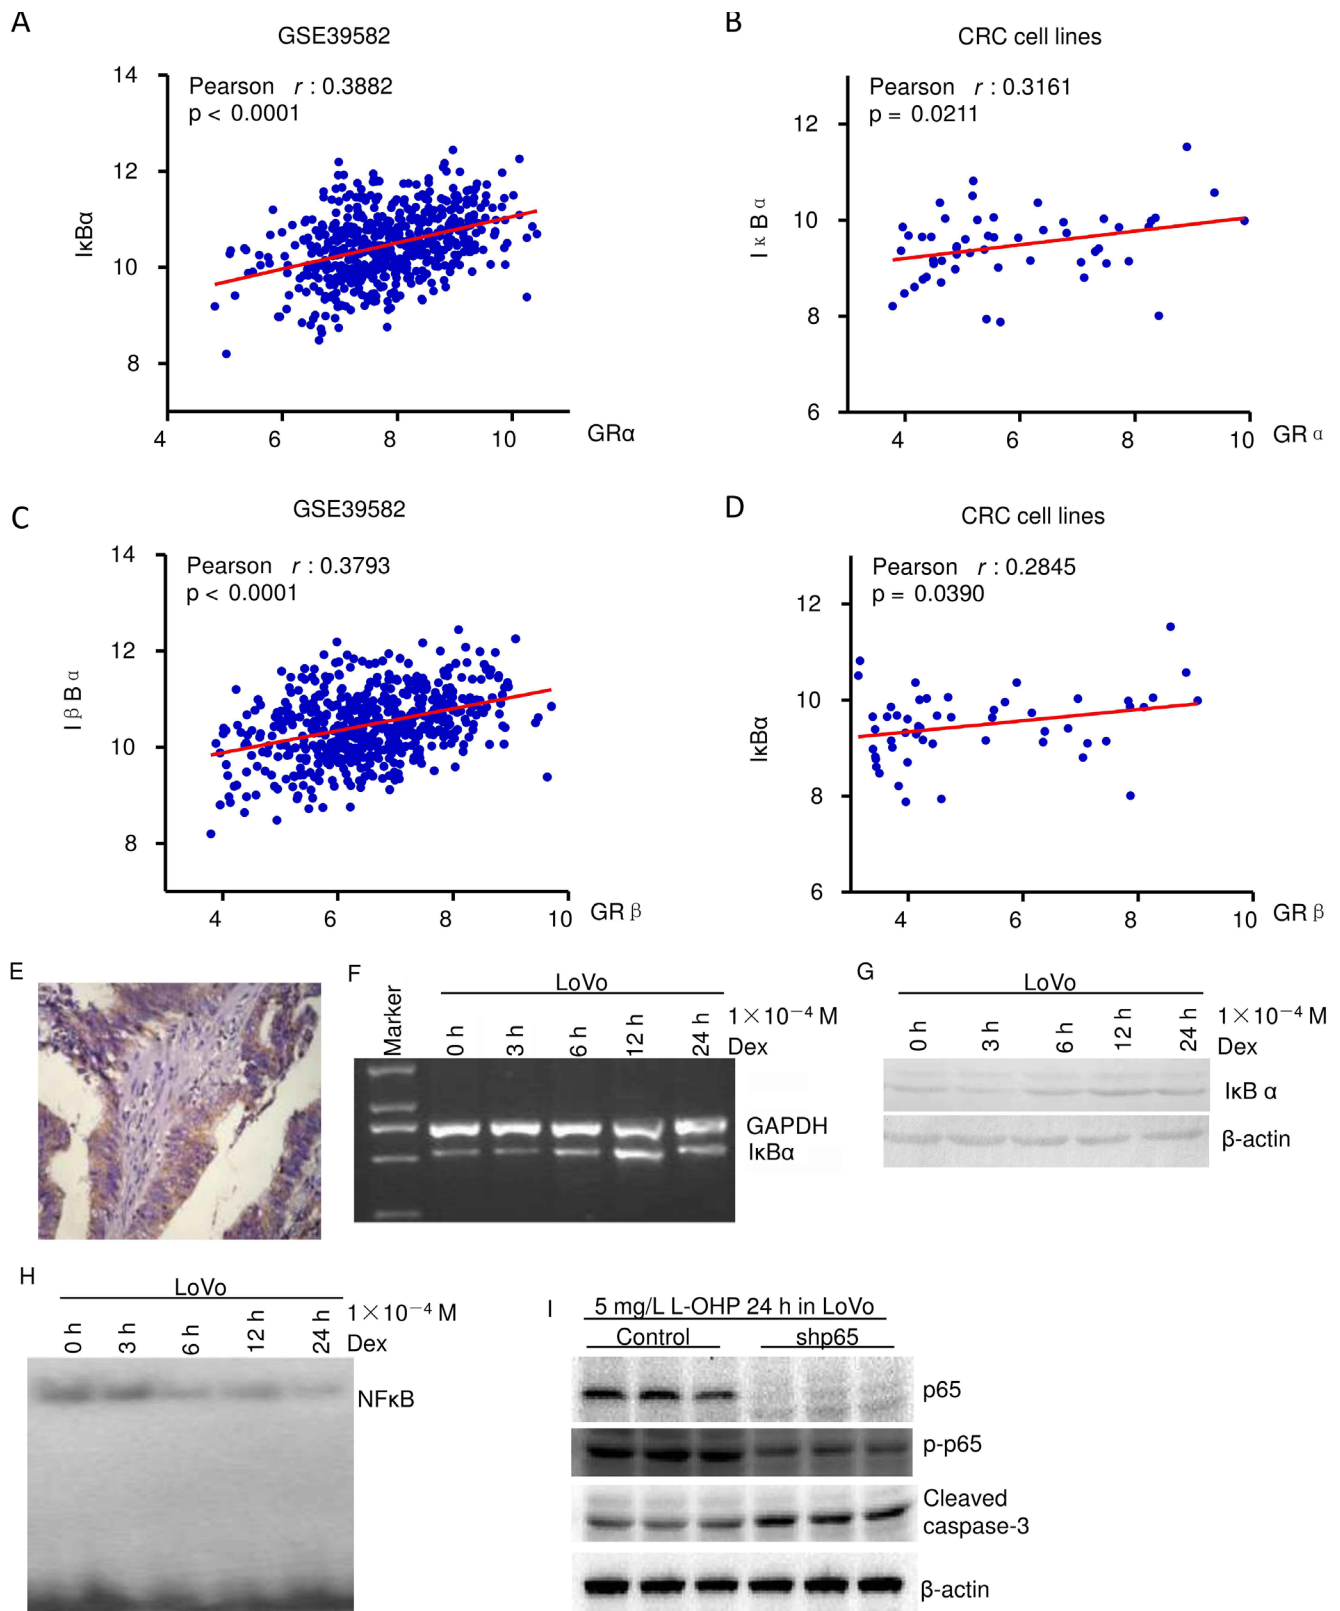

**Figure 5: Dexamethasone suppresses NF-κB activity in colon cancer.** (A–D) Microarray datasets from CRC patients (GSE39582) and from CRC cell lines showed IκBα significantly correlated with GRα (A and B), and with GRβ (C and D). (E) NF-κB p65 immunohistochemistry of colon cancer. (F) RT-PCR. (G) Western blot. (H) LoVo cells were treated with dexamethasone as indicated and NF-κB activity was assayed using EMSA. (I) Western blot. Knockdown of NF-κB p65 increased oxaliplatin induced cleaved caspase 3, an apoptotic marker.



The role and mechanism of glucocorticoids-GR in lymphoma has been well studied [1–2, 6, 8]. It seemed that colon cancer cell line LoVo and lymphoma cell line Jurkat shared the mechanism, glucocorticoids regulating GR to suppress NF- $\kappa$ B activity [2, 6]. Accordingly, effect of dexamethasone on GR $\alpha$ , GR $\beta$ , I $\kappa$ B $\alpha$  and NF- $\kappa$ B in the human T-lymphocyte cell line Jurkat was explored.

Jurkat was treated with  $1 \times 10^{-5}$  M dexamethasone for different times. RT-PCR showed that dexamethasone increased GR $\alpha$  mRNA, GR $\beta$  mRNA and I $\kappa$ B $\alpha$  mRNA in a time dependent manner (Figure 6A–6C). Western blot showed that dexamethasone increased GR $\alpha$  protein and I $\kappa$ B $\alpha$  protein in a time dependent manner (Figure 6D). EMSA showed that dexamethasone decreased NF- $\kappa$ B activity in a time dependent manner (Figure 6E). These, together with other reports [2, 8], suggest that the human T-lymphocyte cell line Jurkat and the human colon cancer cell line LoVo may have a common mechanism, glucocorticoids suppressing NF- $\kappa$ B activity via GR.

The heatmap showed that GR $\alpha$  correlated with bcl-2 (Supplementary Figure 1). Results of RT-PCR and western blot showed that  $1 \times 10^{-4}$  M dexamethasone did not detectably change bcl-2 mRNA level or protein level in LoVo (Supplementary Figure 2A and 2B). Nor  $1 \times 10^{-5}$  M dexamethasone detectably changed bcl-2 mRNA level or protein level in Jurkat (Supplementary Figure 2C and 2D). The correlation of GR $\alpha$  and bcl-2 in human colon cancer was explored. Protein of bcl-2 of archival surgical resection specimens from 61 patients with colon cancer were stained with immunohistochemistry (Supplementary Figure 2E). The presence of positive immunohistochemical staining for bcl-2 did not significantly correlate with GR $\alpha$  ( $P=0.643$ ) (Supplementary Figure 2F). These indicate that bcl-2 might not play a dominant role in the mechanism of glucocorticoids function.

## DISCUSSION

CRC is the third most commonly diagnosed cancer among men and women worldwide [19–20]. Chemotherapy remains one of principle ways to cure CRC [14–16]. Co-administration of glucocorticoids with chemotherapy is a common clinical practice used to prevent drug-induced allergic reaction or nausea/vomiting [2–4]. This study demonstrates that dexamethasone inhibits cell growth, induces apoptosis and enhances chemosensitivity of GR $\alpha$ -rich colon cancer cell lines (Figures 2 and 3). These suggest that glucocorticoids might be a potential solution to increase chemosensitivity of GR $\alpha$ -rich colon cancer or a potential target to treat it in clinic.

The principle function of glucocorticoids is via binding to GR. GR $\alpha$  is the predominant and functionally active receptor [2]. GR $\alpha$  has tissue-specific expression patterns that are conserved in different species [2]. GR $\alpha$  expression level was dramatically lower in colon cancer than in lymphoma, even lower than in normal colon epithelium (Figure 1A and 1E). GR $\alpha$  protein level in most of colorectal cancer cells was too low to be detected (Figure 1A–1C). These contribute to explain the fact that glucocorticoids are effective to treat lymphoma and leukemia while they are generally not as effective to treat CRC [2, 4, 8].

GR $\alpha$  is a ligand-inducible transcription factor and is mainly activated through binding to glucocorticoids [2, 5–6, 9–10]. In the absence of ligand, GR $\alpha$  resides predominantly in the cytoplasm. Upon ligand binding, the GR $\alpha$  complex changes its conformation and translocates to the nucleus [2, 5–6, 9–10]. This was also observed in GR $\alpha$  positive colon cancer cell LoVo. After treatment of dexamethasone, GR $\alpha$  mainly traveled to the nucleus

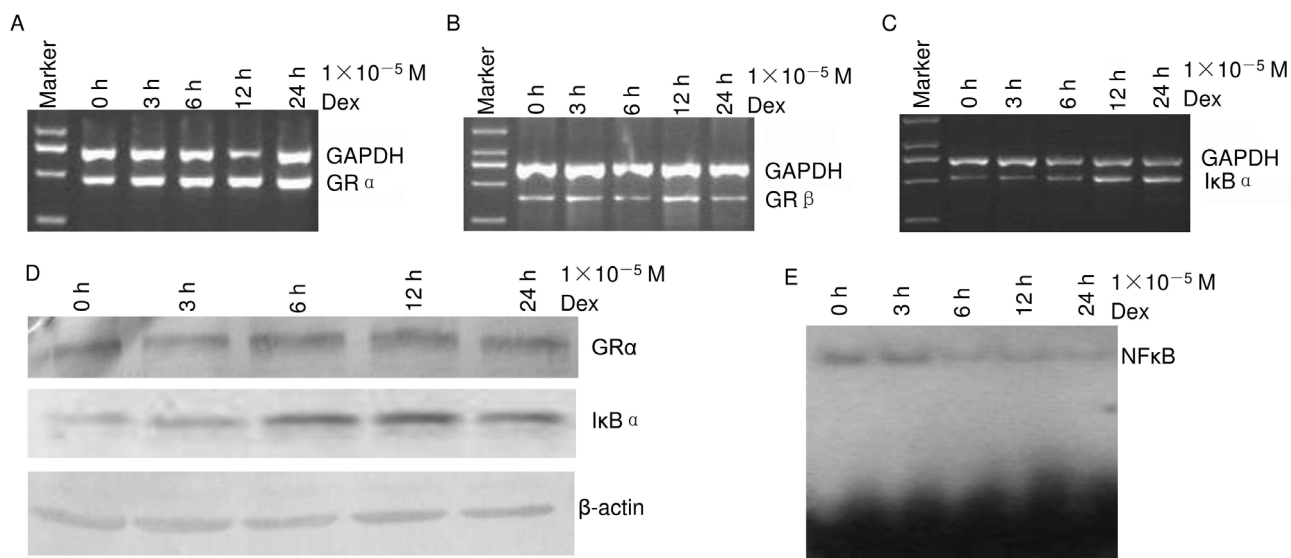

**Figure 6: The effects of dexamethasone in Jurkat. (A–C) RT-PCR. (D) Western blot. (E) NF- $\kappa$ B activity was assayed using EMSA.**

**Table 2: Primers for RT-PCR**

|              |         |                        |
|--------------|---------|------------------------|
| GAPDH        | Forward | CAAATTCATGGCACCGTCA    |
|              | Reverse | GGAGTGGGTGTCGCTGTTGA   |
| GR $\alpha$  | Forward | CCTAAGGACGGTCTGAAGAGC  |
|              | Reverse | GCCAAGTCTTGGGCCCTCTAT  |
| GR $\beta$   | Forward | TACAAGCAGAACTGAGGCACT  |
|              | Reverse | CCTACAGCTACAGTCAGGGAGT |
| I $\kappa$ B | Forward | GCCTGCCACTCAGTGTATTT   |
|              | Reverse | GAGCCATCATCCGTTCTACC   |
| Bcl-2        | Forward | AGCCCAGACAAATGTGGTTAC  |
|              | Reverse | CCCCAATACAGGTCCTTCATA  |
| M-GR         | Forward | GGGACGGATTTTGTGGGTG    |
|              | Reverse | CCCCAATCCCCGAAACTAATA  |
| U-GR         | Forward | GGGATGGATTTTGTGGGTG    |
|              | Reverse | CCCCAATCCCCAAAATAATA   |

(Figure 3A). Interestingly, dexamethasone increased GR $\alpha$  mRNA and protein level in a time dependent manner, through an unknown mechanism (Figure 3B and 3C).

Glucocorticoids functions as agonist of GR $\alpha$  through binding to GR $\alpha$  C-terminus containing important parts of the ligand binding domain [2, 5]. GR $\beta$  is unable to bind glucocorticoids because GR $\beta$  lacks the ligand binding domain [2, 5]. It is reported that GR $\beta$  has the capacity to dominant-negative inhibit GR $\alpha$ , either through competition for co-regulators or through formation of inactive GR $\alpha$ /GR $\beta$  heterodimers [2, 5]. In this study, dexamethasone increased GR $\beta$  mRNA level (Figure 4B). Knockdown of GR $\beta$  enhanced dexamethasone induction of apoptosis (Figure 4C and 4D). These provide evidences to support that GR $\beta$  may be also a dominant-negative inhibitor of GR $\alpha$  in colon cancer.

NF- $\kappa$ B plays a key role of in apoptosis. Suppression of NF- $\kappa$ B activation is a novel and common downstream of glucocorticoids activating GR in lymphoma, lymphoblastic leukaemia cells [2, 8]. I $\kappa$ B $\alpha$ , an inhibitor of NF- $\kappa$ B [10, 17], strongly correlated with GR $\alpha$  and GR $\beta$  (Figure 5A–5D). Dexamethasone increased I $\kappa$ B $\alpha$  and suppressed NF- $\kappa$ B activity in colon cancer cells LoVo and the human T-lymphocyte cell line Jurkat (Figure 5F–5H, Figure 6C–6E). Knockdown of NF- $\kappa$ B p65 increased apoptosis (Figure 5I). These *in vitro* experiments indicate that suppression of NF- $\kappa$ B activation is a novel and common downstream of glucocorticoids, might through GR. *In vivo* experiment also showed that NF- $\kappa$ B expression significantly correlated with GR $\alpha$  (Figures 1A and 5E and Table 1). This supports the above conclusion based on *in vitro* experiments.

The correlation between GR $\alpha$  expression and clinicopathological parameters were also studies. Though

GR $\alpha$  expression did not significantly correlate with cancer stage, lymph node metastasis, patient's sex or age, it significantly correlated with colon cancer differentiation (Figure 1A and Table 1). Taken together, these provide evidences supporting that GR $\alpha$  should play a role in colon cancer. In some cell types, the dominant mechanism of GR silencing is through methylation [2]. But it seems that this might not play a dominant role in GR $\alpha$ -negative colon cancer cell lines, HT29 or SW480 (Figure 1C–1G). The mechanism is far from clear.

In summary, GR $\alpha$  significantly correlated with colon cancer differentiation. Though colon cancer expressed dramatic lower GR $\alpha$  than lymphoma *in vivo*, part of colon cancer cells did express GR $\alpha$ . Dexamethasone inhibited cell growth, induced apoptosis and enhanced chemosensitivity in GR $\alpha$ -rich colon cancer cells via GR $\alpha$ . Suppression of NF- $\kappa$ B activation might be a novel and common downstream of glucocorticoids in colon cancer and lymphoma, likely via GR. These contribute to explain the difference in glucocorticoids effect in colon cancer and in lymphoma, and suggest that glucocorticoids-GR might be a potential solution to treat colon cancer in clinic. The detailed function and mechanism deserve further investigation.

## MATERIALS AND METHODS

### Patients and cancer samples

The archival colon cancer samples were derived from 61 patients undergoing surgical excision and diagnosed at the Department of Pathology, Southwest Hospital, Third Military Medical University. Patients were selected only based on acquirable tissues between

2003 and 2005. The patients who received radiotherapy or chemotherapy prior to surgery were excluded. All available hematoxylin and eosin (H&E) stained slides were reclassified by a pathologist without knowledge of patient's data. Tumor differentiation was graded as follows: well, moderate, or poor.

The archival lymphoma samples were derived from 10 patients undergoing surgical biopsy, diagnosed at the Department of Pathology, and re-diagnosed at the Department of Hematology, Southwest Hospital. Patients were selected only based on acquirable tissues between 2005 and 2006. The patients who received chemotherapy prior to surgery were excluded.

Informed consent was obtained from all patient involved in this study. This study was approved by the Ethics Committee of Southwest Hospital, the Third Military Medical University and was carried out in accordance with the associated guidelines.

### Cell lines and cell culture

Human colon cancer cell lines, LoVo, HCT116, HT29, SW480 and the human T-lymphocyte cell line Jurkat were obtained from the Cell Bank, Chinese Academy of Science. Cells were routinely grown and passaged as previously described [16, 21]. In brief, cells were grown in F12K (Gibco, Grand Island, NY, USA) (LoVo), McCoy's 5A (Gibco) (HCT116 and HT29), Leibovitz's L-15 (Gibco) (SW480), or RPMI-1640 (Gibco) (Jurkat) supplemented with 100 mL/L fetal bovine serum (FBS) (Gibco), 100,000 IU/L penicillin, and 100 mg/L streptomycin (Gibco) under a humidified atmosphere of 5% CO<sub>2</sub> at 37 °C.

### Treatment of 5-Aza

Cells were sequentially incubated with 2 mg/L 5-Aza (Sigma-Aldrich, St Louis, MO, USA)/media, fresh media, 4 mg/L 5-Aza/media, fresh media, 4 mg/L 5-Aza/media, fresh media for 24 hours. Then, cells were acquired [12].

### Treatment of dexamethasone

Cells were incubated with gradient concentrations of dexamethasone (Sigma-Aldrich)/media without FBS for different times as indicated. The control cells were incubated with vehicle (DMSO) in media without FBS.

### Immunohistochemistry

Immunohistochemistry of human samples was performed as previously described [12, 18]. In brief, 10% neutral formalin-fixed, paraffin-embedded tissues were cut into 5 to 6 μm thickness sections. Immunohistochemistry was done according to the manual of SP-9000-D kits (Streptavidin-Biotin) (Beijing Zhongshan Jinqiao

biotechnology Co., Ltd., China). The applied primary antibodies consisted of the following: GRα (Santa Cruz Biotechnology, Santa Cruz, CA, USA), NF-κB p65 and Bcl-2 (Beijing Zhongshan Jinqiao biotechnology Co., Ltd.). Expression of GRα, NF-κB p65 or Bcl-2 was evaluated based on the percentage of positive cells. The slide with lower percentage of positive cells than or equal to 5% was considered as negative. The slide with higher percentage was considered as positive.

Immunohistochemistry of cultured cells was performed as previously described [15]. Cells were cultured on cover slides for 2 days. After fixation in 4% paraformaldehyde for 30 minutes, cells were stained using SP-9000-D kits (Beijing Zhongshan Jinqiao biotechnology Co., Ltd.) according to the manual.

### RT-PCR

RT-PCT was performed as previously described [18, 22]. In brief, total RNA of cells was extracted with Trizol reagent (Invitrogen, Carlsbad, CA, USA), and first-strand cDNA was synthesized using 2 μg of total RNA. Then 1 μL cDNA was taken as a template for the PCR reaction. GAPDH was amplified by PCR using the following cycle: initial denaturation at 94°C for 5 minutes, denaturation at 94°C for 45 sec, reassociation at 57°C for 45 sec, primer extension at 72°C for 45 sec (30 cycles), and a final extension step at 72°C for 10 minutes in the presence of Taq polymerase (TaKaRa Biotechnology Co. Ltd., Japan). GRα was amplified by PCR using the following cycle: initial denaturation at 95°C for 1 minutes, denaturation at 95 °C for 30 sec, reassociation at 62°C for 30 sec, primer extension at 72°C for 30 sec (45 cycles). GRβ was amplified by PCR using the following cycle: initial denaturation at 94°C for 5 minutes, denaturation at 94°C for 45 sec, reassociation at 62°C for 45 sec, primer extension at 72°C for 60 sec (35 cycles). IκB was amplified by PCR using the following cycle: initial denaturation at 94°C for 5 minutes, denaturation at 94°C for 60 sec, reassociation at 55 °C for 45 sec, primer extension at 72°C for 45 sec (35 cycles). Bcl-2 was amplified by PCR using the following cycle: initial denaturation at 94°C for 5 minutes, denaturation at 94°C for 60 sec, reassociation at 61°C for 45 sec, primer extension at 72°C for 45 sec (35 cycles). The PCR products were subjected to agarose gel electrophoresis with ethidium bromide. The primers used for RT-PCR are listed in Table 2. GAPDH was used as an internal standard.

### MSP-PCR

DNA was extracted using phenol-chloroform method as described [23]. DNA was modified by treatment with sodium bisulfite using EZ DNA Methylation kit (Zymo Research, Irvin, CA, USA) following the manufacturer's protocol [12]. MSP-PCR was performed

using the M-GR and U-GR primer (Table 1) for methylated and unmethylated DNA, respectively. Each gene was amplified by PCR using the same cycle as for GR $\beta$ . The reassociation temperatures for M-GR and U-GR were 54°C and 52°C, respectively.

### Flow cytometry

Annexin V-FITC/PI apoptosis detection kit (BD Biosciences Clontech, Palo Alto, CA, USA) was utilized for flow cytometry to determine the percentage of apoptotic cells. Cells were harvested and stained following the manufacturer's protocol [24]. In brief,  $1 \times 10^5$  cells were incubated with 5  $\mu$ L of Annexin V-FITC and 10  $\mu$ L 20  $\mu$ g/mL PI for 15 minutes at room temperature in the dark. Each sample was added with 500  $\mu$ L of PBS binding buffer and analyzed using flow cytometry (BD Biosciences Clontech) within 30 minutes.

### DNA fragmentation

LoVo cells were incubated with or without  $1 \times 10^{-4}$  M dexamethasone (Sigma-Aldrich) in media without FBS for 24, 48, 72 hours. Cells were collected and lysed by DNA lysis buffer (10 mM Tris-HCl, pH 7.5, 10 mM EDTA, pH 8.0, 0.5% Triton X-100, 20% SDS, 10 mg/mL proteinase K). DNA was extracted using phenol-chloroform method. Then, separation by electrophoresis was performed on 2% agarose containing ethidium bromide [23, 25].

### Hoechst staining

LoVo cells were incubated with or without  $1 \times 10^{-4}$  M dexamethasone (Sigma-Aldrich) in media without FBS for 72 hours. Then, cells were incubated with 1  $\mu$ g/mL Hoechst 33342 (Sigma-Aldrich) at 37 °C for 15 minutes and observed under an inverted fluorescence microscope immediately [13].

### TUNEL

LoVo cells were incubated with  $1 \times 10^{-4}$  M dexamethasone (Sigma-Aldrich) in media without FBS for 72 hours. Apoptotic cells were detected using the terminal deoxynucleotidyl transferase-mediated nick end-labeling (TUNEL) stain using an *In Situ* Cell Death Detection Kit, PO (Roche, Germany) following the manufacturer's protocol, as described previously [14].

### MTT assay

Growth inhibition and drug sensitivity were assayed using the MTT assay as previously described [21, 26]. In brief, cells were incubated with MTT (BD Biosciences Clontech) at 37 °C for 4 hours and formazan crystals were dissolved using DMSO (Sigma-Aldrich). The absorbance was measured at 490 nm using a microplate reader.

The absorbance was normalized to their control cells, respectively.

### Western blot

Cells were lysed in RIPA buffer with protease inhibitors and phosphatase inhibitors [15–16]. The protein was resolved by SDS/PAGE and blotted on PVDF membranes (Millipore, Bedford, MA, USA)[15–16]. The PVDF membranes were incubated with specific primary antibodies at 4 °C overnight [15–16]. After incubation with HRP-linked secondary antibodies, immunoreactive proteins were visualized using DAB (Beijing Zhongshan Jinqiao biotechnology Co., Ltd.).

Primary antibody against GR $\alpha$  was from Santa Cruz Biotechnology. I $\kappa$ B $\alpha$ , phospho-p65 and cleaved caspase 3 were from Cell Signaling Technology (Beverly, MA, USA). NF- $\kappa$ B p65, Bcl-2,  $\beta$ -actin and HRP-linked secondary antibodies were from Beijing Zhongshan Jinqiao biotechnology Co., Ltd.

### EMSA

Nuclear extracts were prepared following the protocol of Nuclear Extraction kit (Keygen Biotech, China). EMSA was performed according to the manual of EMSA kit (Keygen Biotech, China). In brief, 2  $\mu$ g nuclear extracts were incubated with <sup>32</sup>P-labeled double-stranded NF- $\kappa$ B probe (5'-AGCTTAGAGGGGACTTTCCGAGAGGA-3'; 5'-TCCTCTCGGAAAGTCCCCCTCTAAGCT-3'). The underlined indicates NF- $\kappa$ B binding site.) for 20 minutes at 37 °C. DNA/nuclear protein complexes were resolved in a native 5% acrylamide gel and the gel was subjected to autoradiography [17].

### Knockdown of genes

GR $\alpha$  was knocked down by plasmid mediated shRNA interference using pGenesil-1 (Genesil Biotechnology Co, Ltd., China) according the manual [27]. The GR $\alpha$ -targeting vector or an empty vector (control) was transfected into LoVo cells using Lipofectamine<sup>®</sup> 2000 (Invitrogen) according to the manufacturer's instructions [14, 21]. The sense sequence of the shRNA targeting GR $\alpha$  is GAGATCATATAGACAATCA.

GR $\beta$  was knocked down by the siRNA sequences. The sense sequence is 5'-GGCUUUUCAUAAAUGGGATT-3' and the anti-sense sequence is 5'-UCCCAU UUAAUGAAAAGCCTC-3'. The sense sequence of scrambled RNAs as a control is 5'-UUCUCCGAA CGUGUCACGUTT-3' and the anti-sense sequence is 5'-ACGUGACACGUUCGGAGAATT-3'. All siRNA duplexes were chemically synthesized by the Shanghai GenePharma Company (China).

NF- $\kappa$ B p65 was knocked down by retroviral mediated shRNA interference as previously described

[14]. The sense sequence of the shRNA targeting p65 is GCCCTATCCCTTTACGTCA.

### Microarray dataset of selection and analysis

Microarray dataset of selection and analysis were performed as previously described [28]. The microarray datasets of CRCs patients and CRC cell lines microarray analyzed here were obtained from the publicly available NCBI Gene Expression Omnibus (GEO, [http:// www.ncbi.nlm.nih.gov/geo/](http://www.ncbi.nlm.nih.gov/geo/)) databank. Accession numbers were GSE39582, GSE36133 and GSE17536.

These datasets were selected according to the following criteria: (1) Microarray was analyzed using Affymetrix Human Genome U133 Plus 2.0 Array. (2) Raw data are available. (3) Both the control and the standard were used. Preprocessing of raw data and quality control was accomplished using robust multichip average (RMA) as previously described [29–30]. The heatmap was performed using the pheatmap package in R as previously described [31–32]. Apoptosis genes and cell cycle signature genes were obtained from HALLMARK APOPTOSIS and KEGG CELL CYCLE Gene sets in Molecular Signatures Database( v5.1) (Broad InSTITUTE) [33].

### Statistical analyses

The data shown represent the mean or the mean  $\pm$  standard error. Statistical differences were analyzed by Student's t-test, one-way ANOVA, Kruskal-Wallis test or Mann-Whitney test.  $p < 0.05$  was considered statistically significant.

### Abbreviations

glucocorticoid receptor, GR; hematoxylin and eosin, H&E; mol/L, M; 5-Aza-2'-deoxycytidin, 5-Aza; Semi-quantitative reverse transcription polymerase chain reaction, RT-PCR; Methylation-specific PCR, MSP-PCR; propidium iodide, PI; Electrophoretic mobility shift assay, EMSA; small hairpin, sh; small interfering RNA, siRNA; half maximal inhibitory concentration,  $IC_{50}$ ; nuclear factor  $\kappa$  B, NF- $\kappa$ B; Inhibitor of  $\kappa$ B, I $\kappa$ B.

### Author contributions

H. Liang, J. Zhou and J. He conceived and designed the project. W. Yang performed microarray analysis; J. He and X. Liang performed the experiment of Figure 5I; J. Zhou, Q. Zhou, X. Pang, J. Li and F. Pan performed other experiments. J. He, H. Liang, J. Zhou and X. Liang analyzed and discussed the data. J. Zhou, J. He and X. Liang prepared the figures. J. He and X. Liang wrote the manuscript. H. Liang revised it. All authors reviewed the manuscript.

## CONFLICTS OF INTEREST

The authors declare no conflicts of interest.

## GRANT SUPPORT

This work was supported by Chongqing Science & Technology Commission grant cstc2016jcyjA2109 (Jianming He).

## REFERENCES

1. He J, Liang H. Skin lesions and neutrophilic leukemoid reaction in a patient with angioimmunoblastic T-cell lymphoma: a case report and review of the literature. *Clin Case Rep.* 2015; 3:483-8.
2. Vandevyver S, Dejager L, Libert C. Comprehensive overview of the structure and regulation of the glucocorticoid receptor. *Endocr Rev.* 2014; 35:671-93.
3. Keith BD. Systematic review of the clinical effect of glucocorticoids on nonhematologic malignancy. *BMC Cancer.* 2008; 8:84.
4. Kemeny N, Seiter K, Niedzwiecki D, Chapman D, Sigurdson E, Cohen A, Botet J, Oderman P, Murray P. A randomized trial of intrahepatic infusion of fluorodeoxyuridine with dexamethasone versus fluorodeoxyuridine alone in the treatment of metastatic colorectal cancer. *Cancer.* 1992; 69:327-34.
5. Ray DW, Davis JR, White A, Clark AJ. Glucocorticoid receptor structure and function in glucocorticoid-resistant small cell lung carcinoma cells. *Cancer Res.* 1996; 56:3276-80.
6. Muthumani K, Choo AY, Zong WX, Madesh M, Hwang DS, Premkumar A, Thieu KP, Emmanuel J, Kumar S, Thompson CB, Weiner DB. The HIV-1 Vpr and glucocorticoid receptor complex is a gain-of-function interaction that prevents the nuclear localization of PARP-1. *Nat Cell Biol.* 2006; 8:170-9.
7. Benes J, Tomankova H, Novakova M, Rohan Z, Kvetnansky R, Myslivecek J. Corticotropin-releasing hormone affects short immobilization stress-induced changes in lung cytosolic and membrane glucocorticoid binding sites. *Cell Mol Neurobiol.* 2013; 33:503-11.
8. Feinman R, Koury J, Thames M, Barlogie B, Epstein J, Siegel DS. Role of NF-kappaB in the rescue of multiple myeloma cells from glucocorticoid-induced apoptosis by bcl-2. *Blood.* 1999; 93:3044-52.
9. Sidler D, Renzulli P, Schnoz C, Berger B, Schneider-Jakob S, Fluck C, Inderbitzin D, Corazza N, Candinas D, Brunner T. Colon cancer cells produce immunoregulatory glucocorticoids. *Oncogene.* 2011; 30:2411-9.
10. Khan S, Lopez-Dee Z, Kumar R, Ling J. Activation of NFkB is a novel mechanism of pro-survival activity of

- glucocorticoids in breast cancer cells. *Cancer Lett.* 2013; 337:90-5.
11. Chen H, Zhang T, Sheng Y, Zhang C, Peng Y, Wang X. Methylation profiling of multiple tumor suppressor genes in hepatocellular carcinoma and the epigenetic mechanism of 3OST2 regulation. *J Cancer.* 2015; 6:740-9.
  12. He J, Pei L, Jiang H, Yang W, Chen J, Liang H. Chemoresistance of colorectal cancer to 5-fluorouracil is associated with silencing of the BNIP3 gene through aberrant methylation. *J Cancer.* 2017; 8:1187-96.
  13. Chen J, Chen J, Li Z, Liu C, Yin L. The apoptotic effect of apigenin on human gastric carcinoma cells through mitochondrial signal pathway. *Tumour Biol.* 2014; 35:7719-26.
  14. He JM, Wang FC, Qi HB, Li Y, Liang HJ. Down-regulation of alphav integrin by retroviral delivery of small interfering RNA reduces multicellular resistance of HT29. *Cancer Lett.* 2009; 284:182-8.
  15. Liang X, Xu X, Wang F, Chen X, Li N, Wang C, He J. E-cadherin knockdown increases beta-catenin reducing colorectal cancer chemosensitivity only in three-dimensional cultures. *Int J Oncol.* 2015; 47:1517-27.
  16. Liang X, Xu X, Wang F, Li N, He J. E-cadherin increasing multidrug resistance protein 1 via hypoxia-inducible factor-1alpha contributes to multicellular resistance in colorectal cancer. *Tumour Biol.* 2016; 37:425-35.
  17. He H, Chen L, Zhai M, Chen JZ. Genistein down-regulates the constitutive activation of nuclear factor-kappaB in human multiple myeloma cells, leading to suppression of proliferation and induction of apoptosis. *Phytother Res.* 2009; 23:868-73.
  18. Li Y, He J, Zhong D, Li J, Liang H. High-mobility group box 1 protein activating nuclear factor-kappaB to upregulate vascular endothelial growth factor C is involved in lymphangiogenesis and lymphatic node metastasis in colon cancer. *J Int Med Res.* 2015; 43:494-505.
  19. He J, Shin H, Wei X, Kadegowda AK, Chen R, Xie SK. NPC1L1 knockout protects against colitis-associated tumorigenesis in mice. *BMC Cancer.* 2015; 15:189.
  20. Torre LA, Bray F, Siegel RL, Ferlay J, Lortet-Tieulent J, Jemal A. Global cancer statistics, 2012. *CA Cancer J Clin.* 2015; 65:87-108.
  21. He J, Liang X, Luo F, Chen X, Xu X, Wang F, Zhang Z. P53 is involved in a three-dimensional architecture-mediated decrease in chemosensitivity in colon cancer. *J Cancer.* 2016; 7:900-9.
  22. He J, Wang F, Luo F, Chen X, Liang X, Jiang W, Huang Z, Lei J, Shan F, Xu X. Effects of long term low- and high-dose sodium arsenite exposure in human transitional cells. *Am J Transl Res.* 2017; 9:416-28.
  23. Kramvis A, Bukofzer S, Kew MC. Comparison of hepatitis B virus DNA extractions from serum by the QIAamp blood kit, GeneReleaser, and the phenol-chloroform method. *J Clin Microbiol.* 1996; 34:2731-3.
  24. Rozati S, Cheng PF, Widmer DS, Fujii K, Levesque MP, Dummer R. Romidepsin and azacitidine synergize in their epigenetic modulatory effects to induce apoptosis in CTCL. *Clin Cancer Res.* 2016; 22:2020-31.
  25. Kwon SJ, Lee JH, Moon KD, Jeong IY, Yee ST, Lee MK, Seo KI. Isoegomaketone induces apoptosis in SK-MEL-2 human melanoma cells through mitochondrial apoptotic pathway via activating the PI3K/Akt pathway. *Int J Oncol.* 2014; 45:1969-76.
  26. Li Y, Liu D, Zhou Y, Li Y, Xie J, Lee RJ, Cai Y, Teng L. Silencing of survivin expression leads to reduced proliferation and cell cycle arrest in cancer cells. *J Cancer.* 2015; 6:1187-94.
  27. Peng Q, Zhou Q, Zhou J, Zhong D, Pan F, Liang H. Stable RNA interference of hexokinase II gene inhibits human colon cancer LoVo cell growth *in vitro* and *in vivo*. *Cancer Biol Ther.* 2008; 7:1128-35.
  28. Fagone P, Nicoletti F, Salvatorelli L, Musumeci G, Magro G. Cyclin D1 and Ewing's sarcoma/PNET: a microarray analysis. *Acta Histochem.* 2015; 117:824-8.
  29. de Reynies A, Assie G, Rickman DS, Tissier F, Groussin L, Rene-Corail F, Dousset B, Bertagna X, Clausser E, Bertherat J. Gene expression profiling reveals a new classification of adrenocortical tumors and identifies molecular predictors of malignancy and survival. *J Clin Oncol.* 2009; 27:1108-15.
  30. Barker A, Morton A, Gatton M, Tong E, Clements A. Sequential monitoring of hospital adverse events when control charts fail: the example of fall injuries in hospitals. *Qual Saf Health Care.* 2009; 18:473-7.
  31. Xu S, Ao J, Gu H, Wang X, Xie C, Meng D, Wang L, Liu M. IL-22 impedes the proliferation of Schwann cells: transcriptome sequencing and bioinformatics analysis. *Mol Neurobiol.* 2017; 54:2395-405.
  32. Guha SK, Tillu R, Sood A, Patgaonkar M, Nanavaty IN, Sengupta A, Sharma S, Vaidya VA, Pathak S. Single episode of mild murine malaria induces neuroinflammation, alters microglial profile, impairs adult neurogenesis, and causes deficits in social and anxiety-like behavior. *Brain Behav Immun.* 2014; 42:123-37.
  33. Subramanian A, Tamayo P, Mootha VK, Mukherjee S, Ebert BL, Gillette MA, Paulovich A, Pomeroy SL, Golub TR, Lander ES, Mesirov JP. Gene set enrichment analysis: a knowledge-based approach for interpreting genome-wide expression profiles. *Proc Natl Acad Sci U S A.* 2005; 102:15545-50.
